# Supplementary material for: Herd clustering strategies and corresponding genetic evaluations based on social–ecological characteristics for a local endangered cattle breed
Source: Copernicus journal article supplement (doi:10.5194/aab-64-187-2021), 2021-05-26
Supplement: Supplementary file 1 [file aab-64-187-2021-supplement.zip]

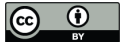

## *Supplement of*

# **Herd clustering strategies and corresponding genetic evaluations based on social–ecological characteristics for a local endangered cattle breed**

**Jonas Herold et al.**

*Correspondence to:* Sven König ([sven.koenig@agrar.uni-giessen.de](mailto:sven.koenig@agrar.uni-giessen.de))

- [aab-64-187-2021-supplement-title-page.pdf](#)
- [supplementary\\_Tables\\_Figures](#)
  - [Table\\_S1\\_Figure\\_S1.docx](#)

The copyright of individual parts of the supplement might differ from the article licence.
